# Supplementary material
Source: Elsevier journal article supplement (https://www.sciencedirect.com/science/article/pii/S2173572721002009)
Supplement: mmc2 [file S2173572721002009:mmc2.pdf]

## Anexo II: Cuaderno de recogida de datos (CRD) electrónico

**TransfusionDay**

Contador:01

- Buscar pacientes
- Lista centros

REGISTRO

- Ver paciente
- Volver

Contador:01

- Buscar pacientes
- Lista centros

REGISTRO

- Ver paciente
- Volver

### Paciente

Editar paciente

|                                              |                                                                                                                     |
|----------------------------------------------|---------------------------------------------------------------------------------------------------------------------|
| 2. N° paciente                               |                                                                                                                     |
| 3. Edad                                      |                                                                                                                     |
| 4. Sexo                                      |                                                                                                                     |
| 5. Escala SOFA                               |                                                                                                                     |
| 6. Ventilación mecánica                      |                                                                                                                     |
| 8. Técnicas de depuración extrarenal         |                                                                                                                     |
| 8. Anticoagulado                             |                                                                                                                     |
| 9. Antiagregado                              |                                                                                                                     |
| 10. ECMO                                     |                                                                                                                     |
| 11. Motivo de Ingreso                        |                                                                                                                     |
| 12. Tipo de Admisión                         |                                                                                                                     |
| 13. Dias de Estancia                         |                                                                                                                     |
| 14. Hemoglobina Previa                       |                                                                                                                     |
| 15. VCM Previa                               |                                                                                                                     |
| 15. VCM Previa                               |                                                                                                                     |
| 16. Concentrado hematíes Previo              |                                                                                                                     |
| 17. INR Previa                               |                                                                                                                     |
| 18. Plaquetas Previa                         |                                                                                                                     |
| 19. Exitus 24 horas                          |                                                                                                                     |
| 20. Paciente transfundido                    |                                                                                                                     |
| 21. Motivo de transfusión                    |                                                                                                                     |
| 22. Qué se ha transfundido                   | <input type="checkbox"/> Plasma <input type="checkbox"/> Plaquetas <input type="checkbox"/> Concentrado de hematíes |
| 23. Fármacos prohemostáticos                 |                                                                                                                     |
| 24. Unidades transfundidas                   |                                                                                                                     |
| Plasma                                       |                                                                                                                     |
| Plaquetas                                    |                                                                                                                     |
| Concentrado de hematíes                      |                                                                                                                     |
| 25. Número de actos transfusionales          |                                                                                                                     |
| 26. ¿ Se ha realizado control transfusional? |                                                                                                                     |
| 27. Hemoglobina tras transfusión             |                                                                                                                     |
| 28. VCM tras transfusión                     |                                                                                                                     |
| 29. Concentrado hematíes tras transfusión    |                                                                                                                     |
| 30. Plaquetas tras transfusión               |                                                                                                                     |
| 31. INR tras transfusión                     |                                                                                                                     |
| 32. PO2/FIO2                                 |                                                                                                                     |
| 33. Láctico                                  |                                                                                                                     |
| 34. SVo2                                     |                                                                                                                     |
